# Supplementary material for: Construction of SnO2/Co3Sn2@C and SnO2/Co3Sn2@Air@C hierarchical heterostructures for efficient electromagnetic wave absorption
Source: Royal Society of Chemistry journal article supplement (doi:10.1039/c8tc03260b), 2018-01-01
Supplement: c8tc03260b1.pdf [file c8tc03260b1.pdf]

## Supporting Information

### **Construction of $\text{SnO}_2/\text{Co}_3\text{Sn}_2@\text{C}$ and $\text{SnO}_2/\text{Co}_3\text{Sn}_2@\text{Air}@\text{C}$ hierarchical heterostructures for efficient electromagnetic wave absorption**

Suyun Wang, Shisi Peng, Suting Zhong, Wei Jiang\*

*National Special Superfine Powder Engineering Technology Research Center,  
Nanjing University of Science and Technology, 210094, Nanjing, China.*

\* Corresponding author E-mail: [superfine\\_jw@126.com](mailto:superfine_jw@126.com); Tel: +86-025-8431-5942.

## S1. Electromagnetic Wave Absorption Measurement

Composites used for electromagnetic wave absorption measurement were prepared by mixing samples with paraffin at a mass ratio of 3:7, respectively. Then the mixtures were compressed into cylindrical specimens with an inner diameter of 3.04 mm, outer diameter of 7 mm, and the thickness of 2 mm. The complex permittivity  $\epsilon_r$  ( $\epsilon_r = \epsilon_r' - j\epsilon_r''$ ) and permeability  $\mu_r$  ( $\mu_r = \mu_r' - j\mu_r''$ ) of the composites were measured by an Agilent E8363A vector network analyzer in the frequency range of 2-18 GHz.

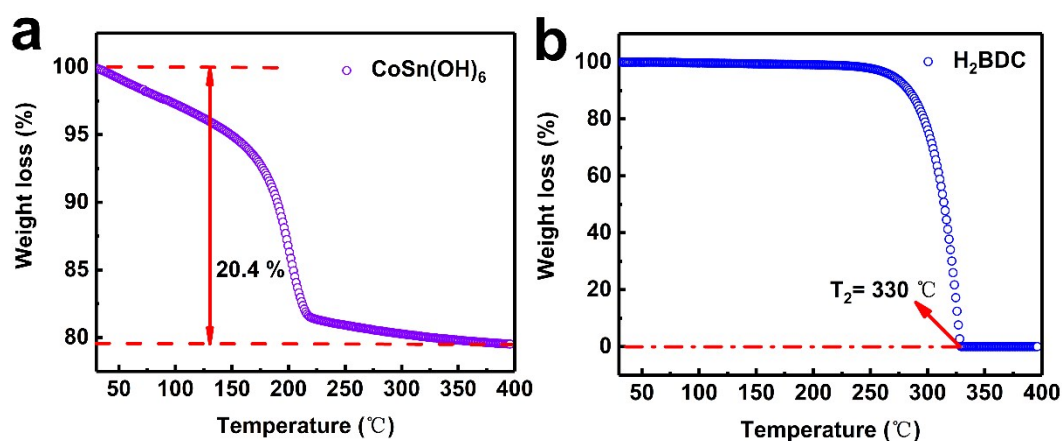

**Figure S1.** TGA curves of CoSn(OH)<sub>6</sub> (a) and H<sub>2</sub>BDC (b) which were tested in air from 50°C to 400°C.

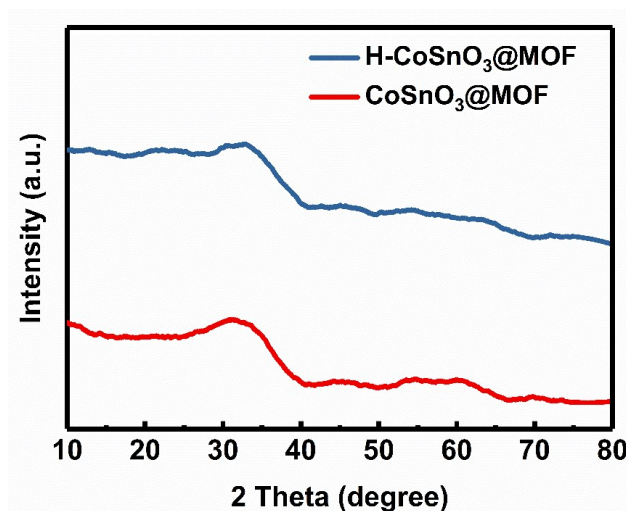

**Figure S2.** XRD pattern of the hollow CoSnO<sub>3</sub>@MOF and H-CoSnO<sub>3</sub>@MOF nanocubes.

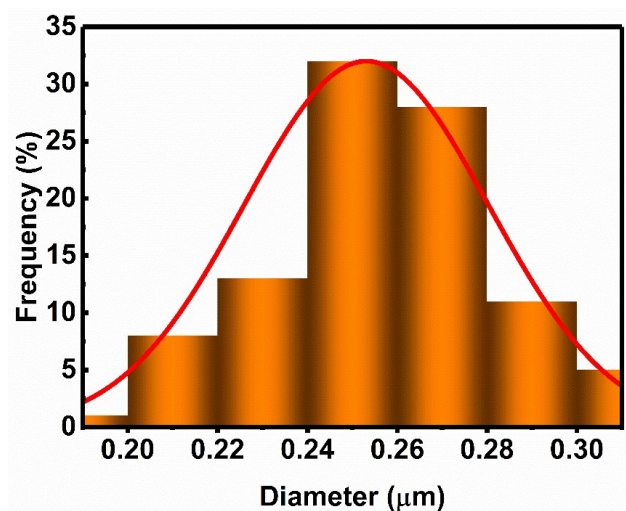

**Figure S3.** Size distribution of CoSn(OH)<sub>6</sub> particles.

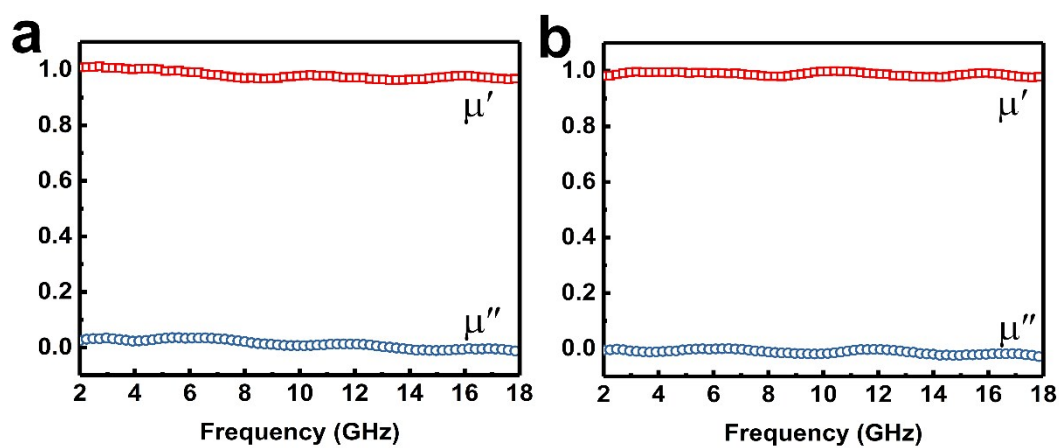

**Figure S4.** Real part ( $\mu'$ ) and imaginary part ( $\mu''$ ) of permeability for SnO<sub>2</sub>/Co<sub>3</sub>Sn<sub>2</sub>@C(a) and SnO<sub>2</sub>/Co<sub>3</sub>Sn<sub>2</sub>@Air@C(b)

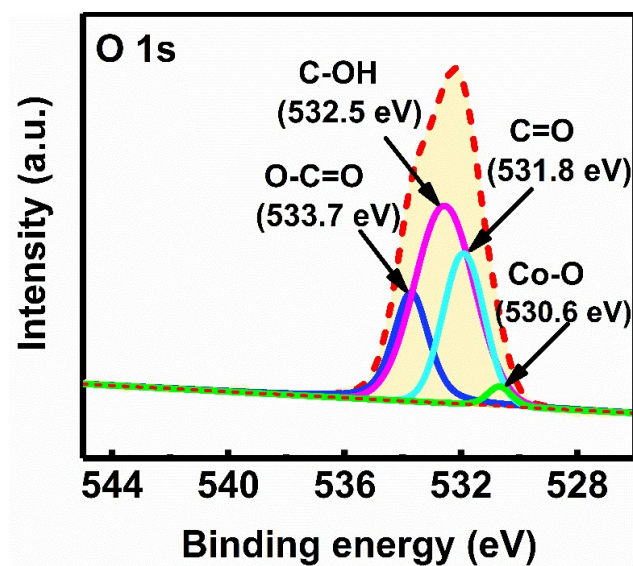

**Figure S5.** XPS survey spectrum of O 1s region of SnO<sub>2</sub>/Co<sub>3</sub>Sn<sub>2</sub>@C.

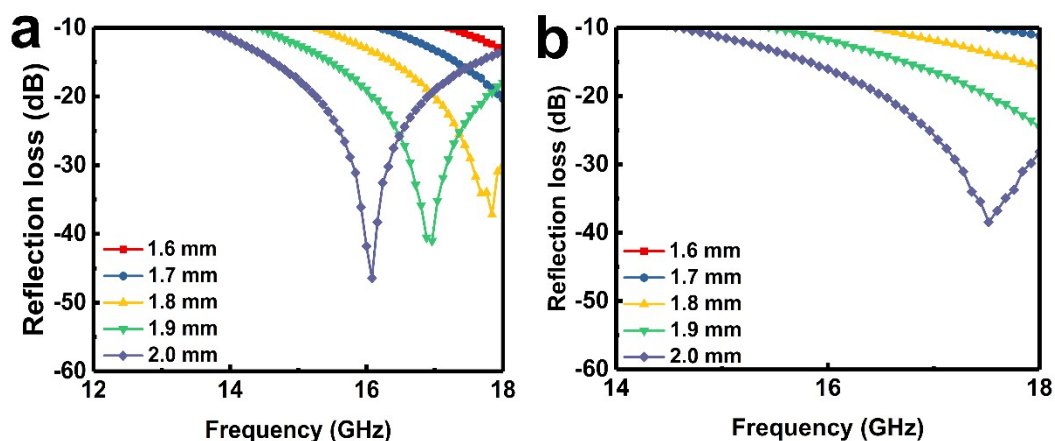

**Figure S6.** Calculated RL curves of  $\text{SnO}_2/\text{Co}_3\text{Sn}_2@\text{C}$  and  $\text{SnO}_2/\text{Co}_3\text{Sn}_2@\text{Air}@\text{C}$  with the thickness of 1.6 -2.0 mm.

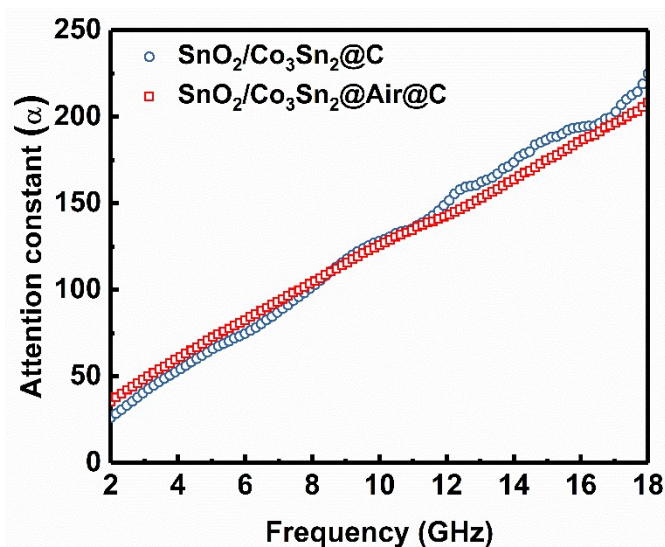

**Figure S7.** Attention constant ( $\alpha$ ) of  $\text{SnO}_2/\text{Co}_3\text{Sn}_2@\text{C}$  and  $\text{SnO}_2/\text{Co}_3\text{Sn}_2@\text{Air}@\text{C}$

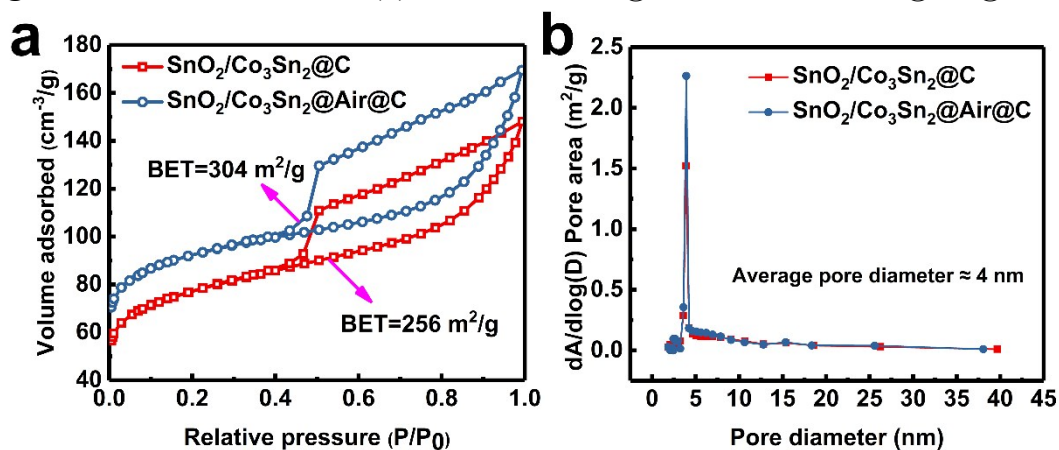

**Figure S8.**  $\text{N}_2$  adsorption-desorption isotherms (a) and pore size distributions (b) of  $\text{SnO}_2/\text{Co}_3\text{Sn}_2@\text{C}$  and  $\text{SnO}_2/\text{Co}_3\text{Sn}_2@\text{Air}@\text{C}$  hybrids.
